# Supplementary material
Source: PubMed Central journal article supplement (PMC3837969)
Supplement: IAI.00527-13_zii999090417so1.pdf [file IAI.00527-13_zii999090417so1.pdf]

**Figure S1**

**A**

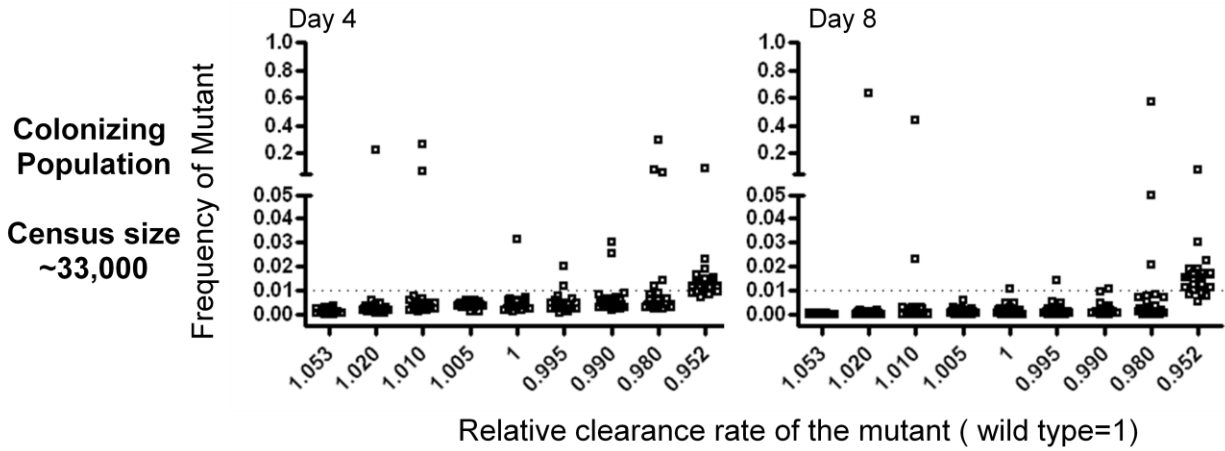

**B**

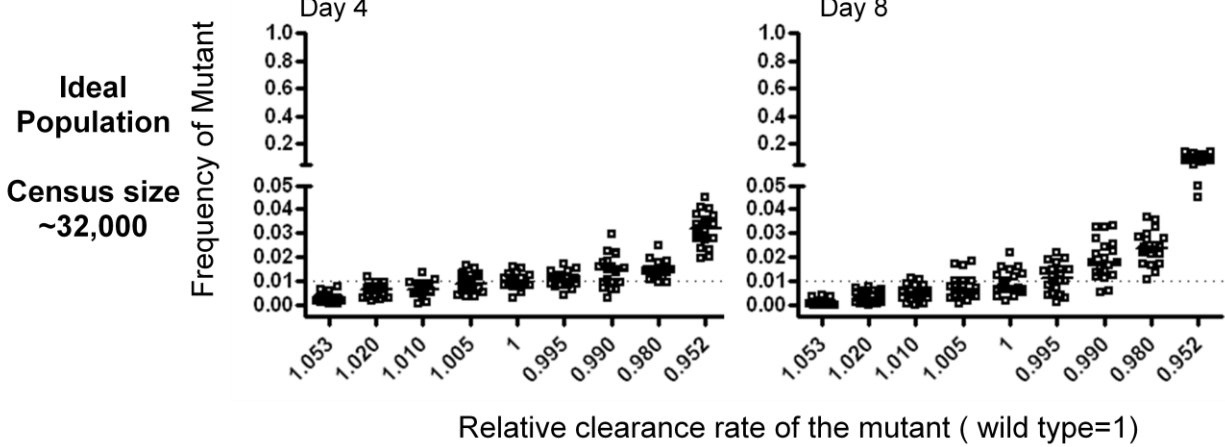

**Figure S1.** Effect of small  $N_e$  on the effectiveness of within-host selection. Simulations were performed based on a colonizing population model (A) or an ideal population model (B) (see Materials and Methods for detail). A range of clearance rates were applied to the mutant allele while the clearance rate for the wild type allele was kept constant at  $0.0043 \text{ min}^{-1}$ . For each mutant clearance rate, twenty simulations were performed. The dotted lines indicate the initial frequency of the mutant allele (0.01 on Day 0). Frequencies of the mutant alleles on Day 4 (25 generations, left) and Day 8 (50 generations, right) are shown. Bars represent means.
